# Supplementary material for: The Complexity of Bariatric Patient’s Pharmacotherapy: Sildenafil Biopharmaceutics and Pharmacokinetics before vs. after Gastric Sleeve/Bypass
Source: MDPI journal article supplement (doi:10.3390/pharmaceutics15122795), 2023-12-18
Supplement: s1 [file s1]

**Table S1. Comparison of the simulated and observed pharmacokinetic parameters for sildenafil**

| 20 mg                          | Observed <sup>a</sup> | Predicted | Fold error | R <sup>2</sup> value |
|--------------------------------|-----------------------|-----------|------------|----------------------|
| C <sub>max</sub> (ng/ml)       | 67.10                 | 62.83     | 0.94       | 0.9637               |
| t <sub>max</sub> (h)           | 0.78                  | 1.12      | 1.44       |                      |
| AUC <sub>0–inf</sub> (ng h/ml) | 204.70                | 205.55    | 1.00       |                      |
| 50 mg                          | Observed <sup>a</sup> | Predicted | Fold error |                      |
| C <sub>max</sub> (ng/ml)       | 147.00                | 162.16    | 1.10       |                      |
| t <sub>max</sub> (h)           | 1.01                  | 1.01      | 1.00       |                      |
| AUC <sub>0–inf</sub> (ng h/ml) | 519.10                | 513.87    | 0.99       |                      |
| 100 mg                         | Observed <sup>a</sup> | Predicted | Fold error |                      |
| C <sub>max</sub> (ng/ml)       | 277.00                | 314.09    | 1.13       |                      |
| t <sub>max</sub> (h)           | 1.75                  | 1.20      | 0.69       |                      |
| AUC <sub>0–inf</sub> (ng h/ml) | 1559.30               | 1027.70   | 0.66       |                      |

<sup>a</sup> Estimated from the mean plasma concentration–time profiles

**Table S2. Percent decrease/increase<sup>a</sup> in the simulated values of pharmacokinetic parameters for sildenafil before and after bariatric surgery in comparison to pre-surgery state**

| 25 mg                | Post-SG<br>(gastric pH=5) | Post-OAGB<br>(gastric pH=7) |
|----------------------|---------------------------|-----------------------------|
| C <sub>max</sub>     | -0.32                     | 31.00                       |
| t <sub>max</sub>     | -7.14                     | -64.29                      |
| AUC <sub>0–inf</sub> | 0.00                      | 0.28                        |
| 50 mg                | Post-SG<br>(gastric pH=5) | Post-OAGB<br>(gastric pH=7) |
| C <sub>max</sub>     | 1.87                      | 36.00                       |
| t <sub>max</sub>     | -14.29                    | -64.29                      |
| AUC <sub>0–inf</sub> | 0.00                      | 0.66                        |
| 100 mg               | Post-SG<br>(gastric pH=5) | Post-OAGB<br>(gastric pH=7) |
| C <sub>max</sub>     | 6.18                      | 42.88                       |
| t <sub>max</sub>     | -20.00                    | -60.00                      |
| AUC <sub>0–inf</sub> | 0.00                      | 1.92                        |

<sup>a</sup> Calculated as: (value<sub>pre-surgery</sub>–value<sub>post-surgery</sub>) x 100/value<sub>pre-surgery</sub>;
